# Supplementary material for: Population Structure of Hispanics in the United States: The Multi-Ethnic Study of Atherosclerosis
Source: PLOS journal article supplement (doi:10.1371/journal.pgen.1002640), 2012-04-12

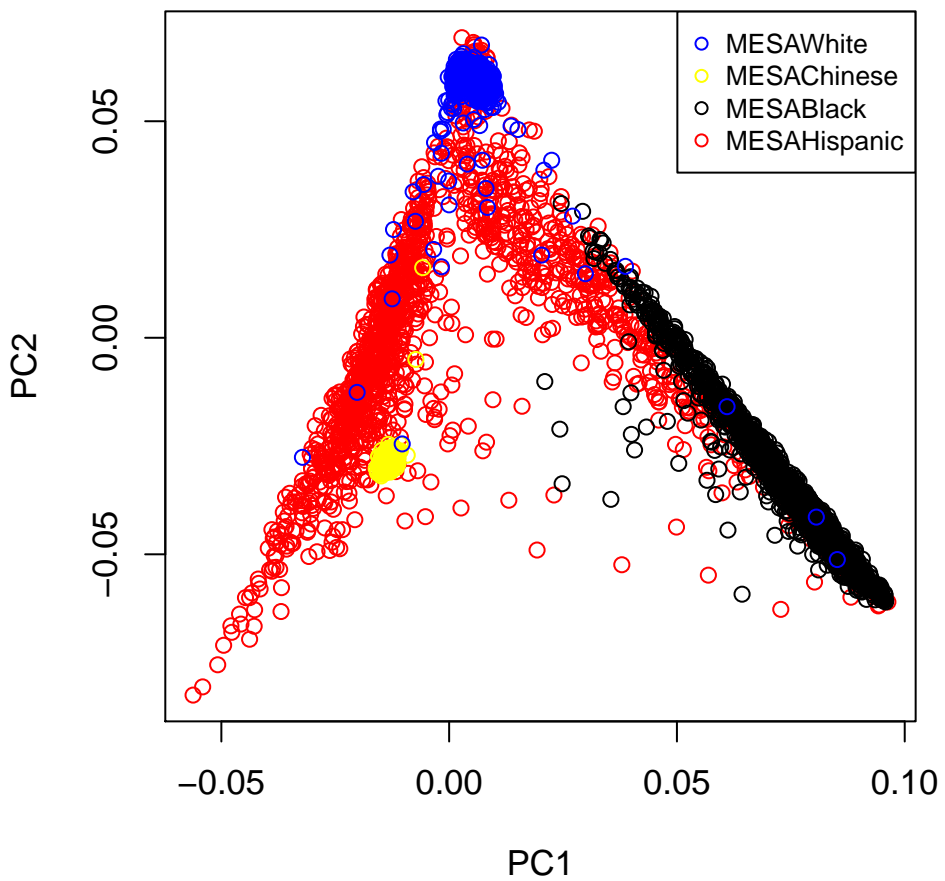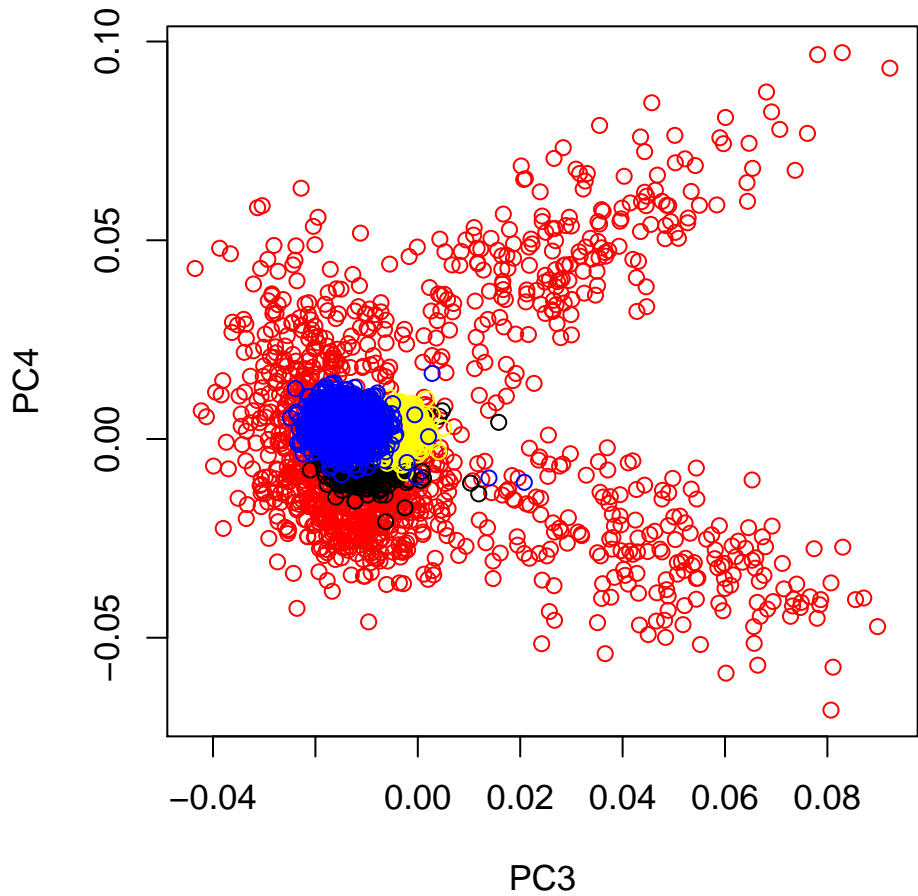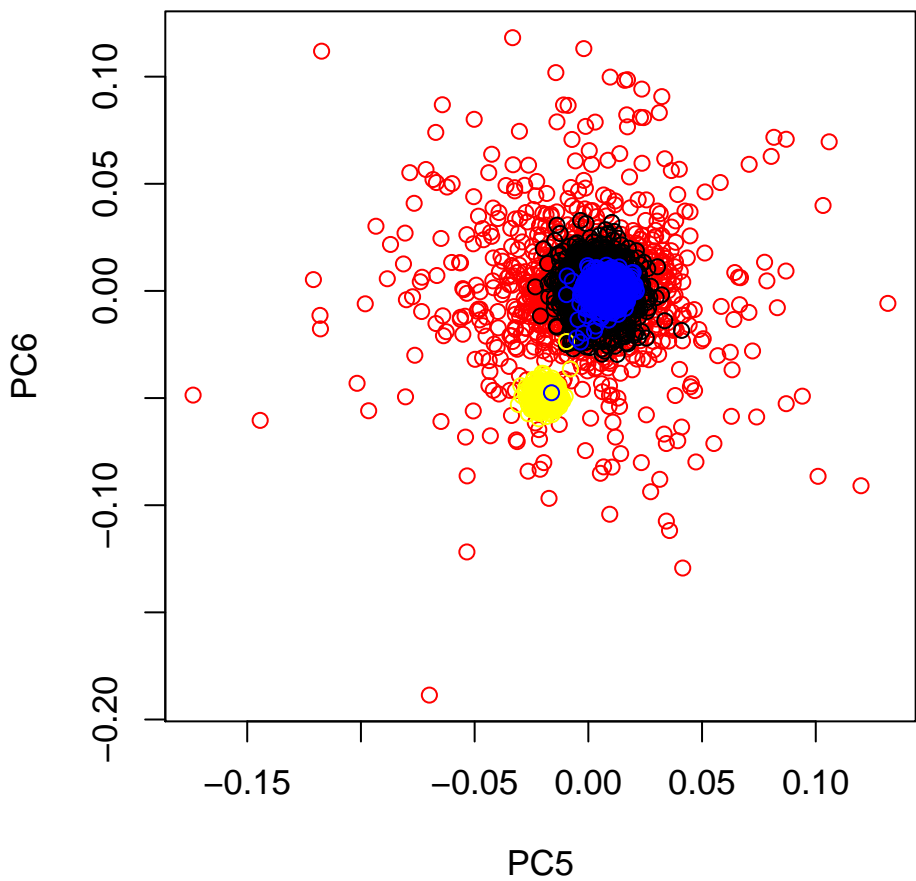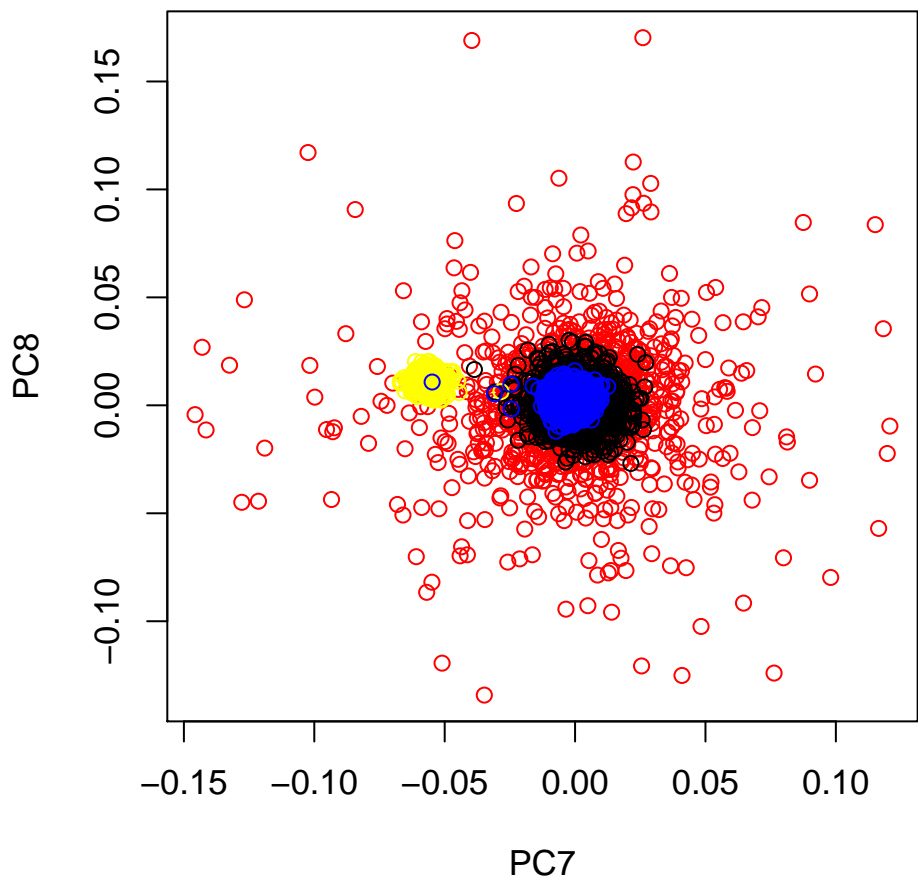

Supplement: S1 (10.1371/journal.pgen.1002640.s001) [file journal.pgen.1002640.s001]
